# Supplementary material for: Transglutaminase 2-Mediated p53 Depletion Promotes Angiogenesis by Increasing HIF-1α-p300 Binding in Renal Cell Carcinoma
Source: PubMed Central journal article supplement (PMC7404067; doi:10.3390/ijms21145042), 2020-07-17
Supplement: ijms-21-05042-s001.pdf [file ijms-21-05042-s001.pdf]

# Supplementary Figure 1

A

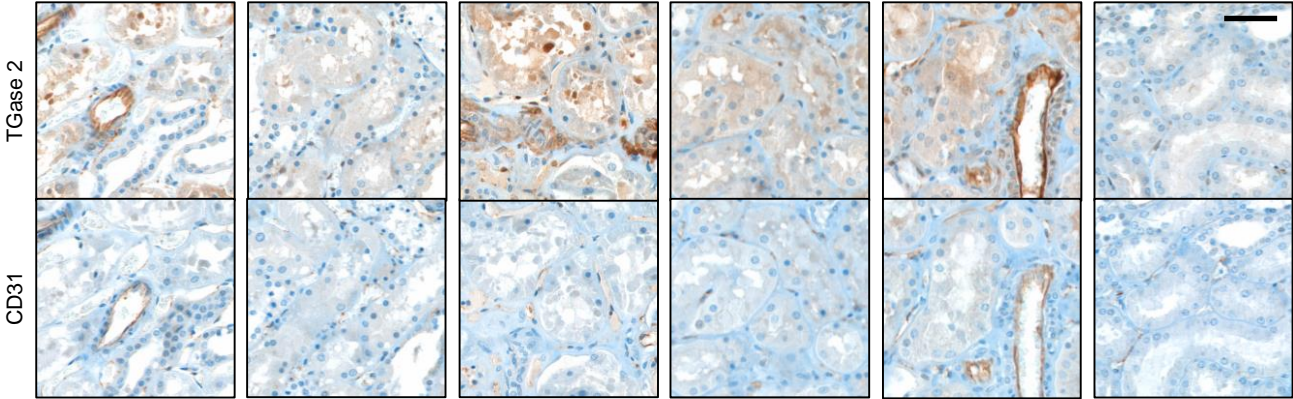

Scale bar = 50  $\mu$ m.

B

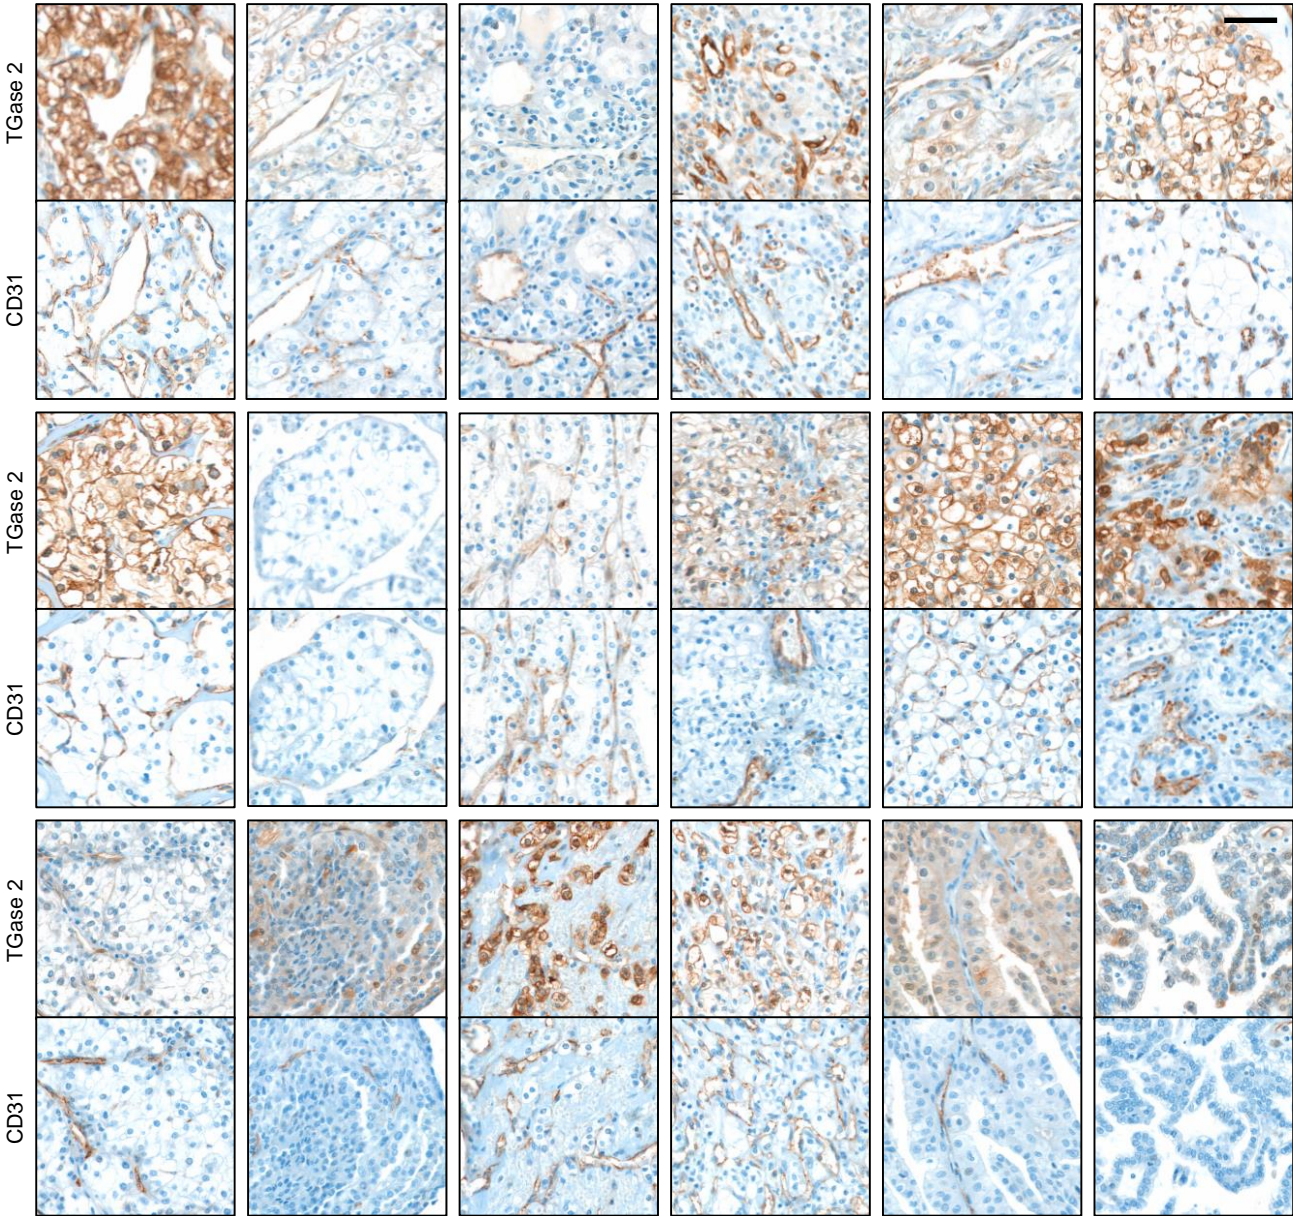

Scale bar = 50  $\mu$ m.

# Supplementary Figure 1

B (continued)

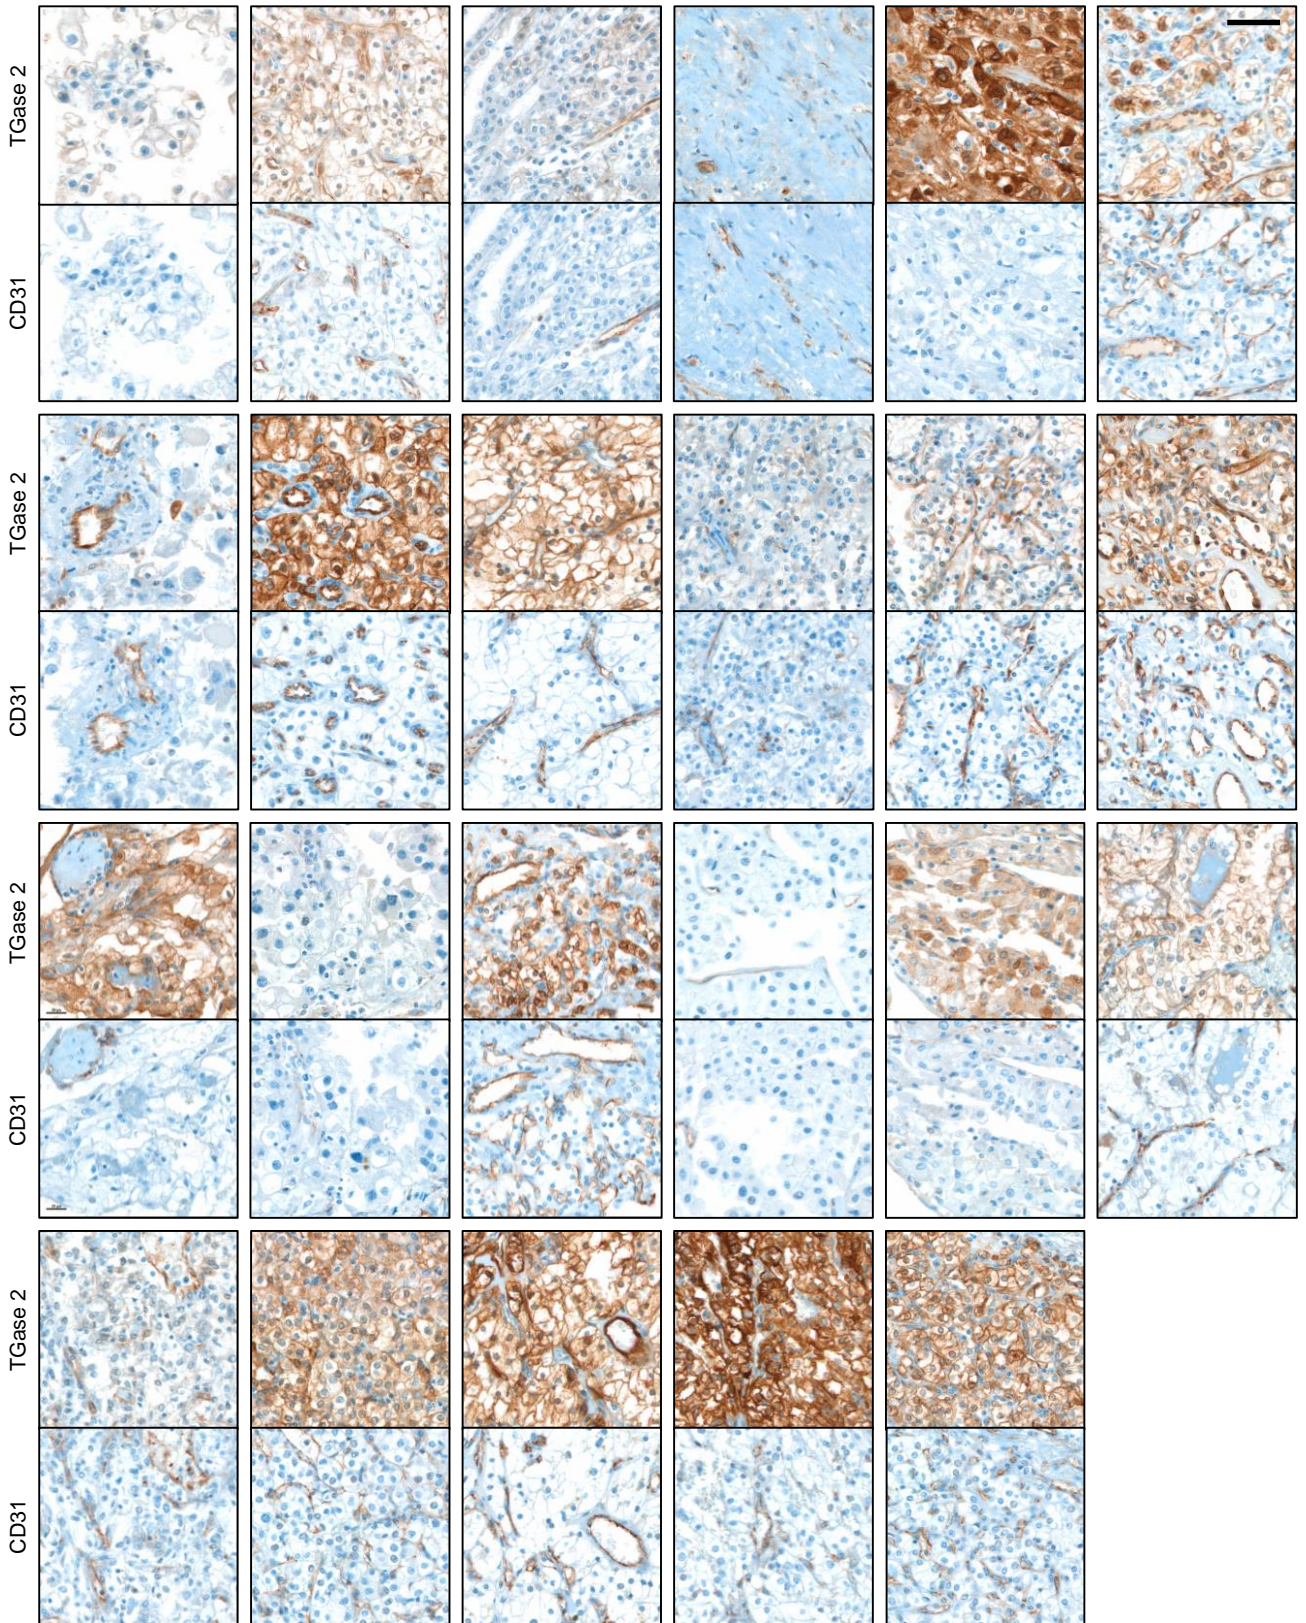

Supplementary Figure 1. Immunohistochemical staining of TGase 2 and CD31 in a human clear cell renal cell carcinoma tissue microarray. (A) Image of TGase 2 (Top) and CD31 (Bottom) staining in human normal kidney tissues. (B) Image of TGase 2 (Top) and CD31 (Bottom) staining in human clear cell renal cell carcinoma tissues. Scale bar = 50  $\mu$ m.

# Supplementary Figure 2

Figure 2A

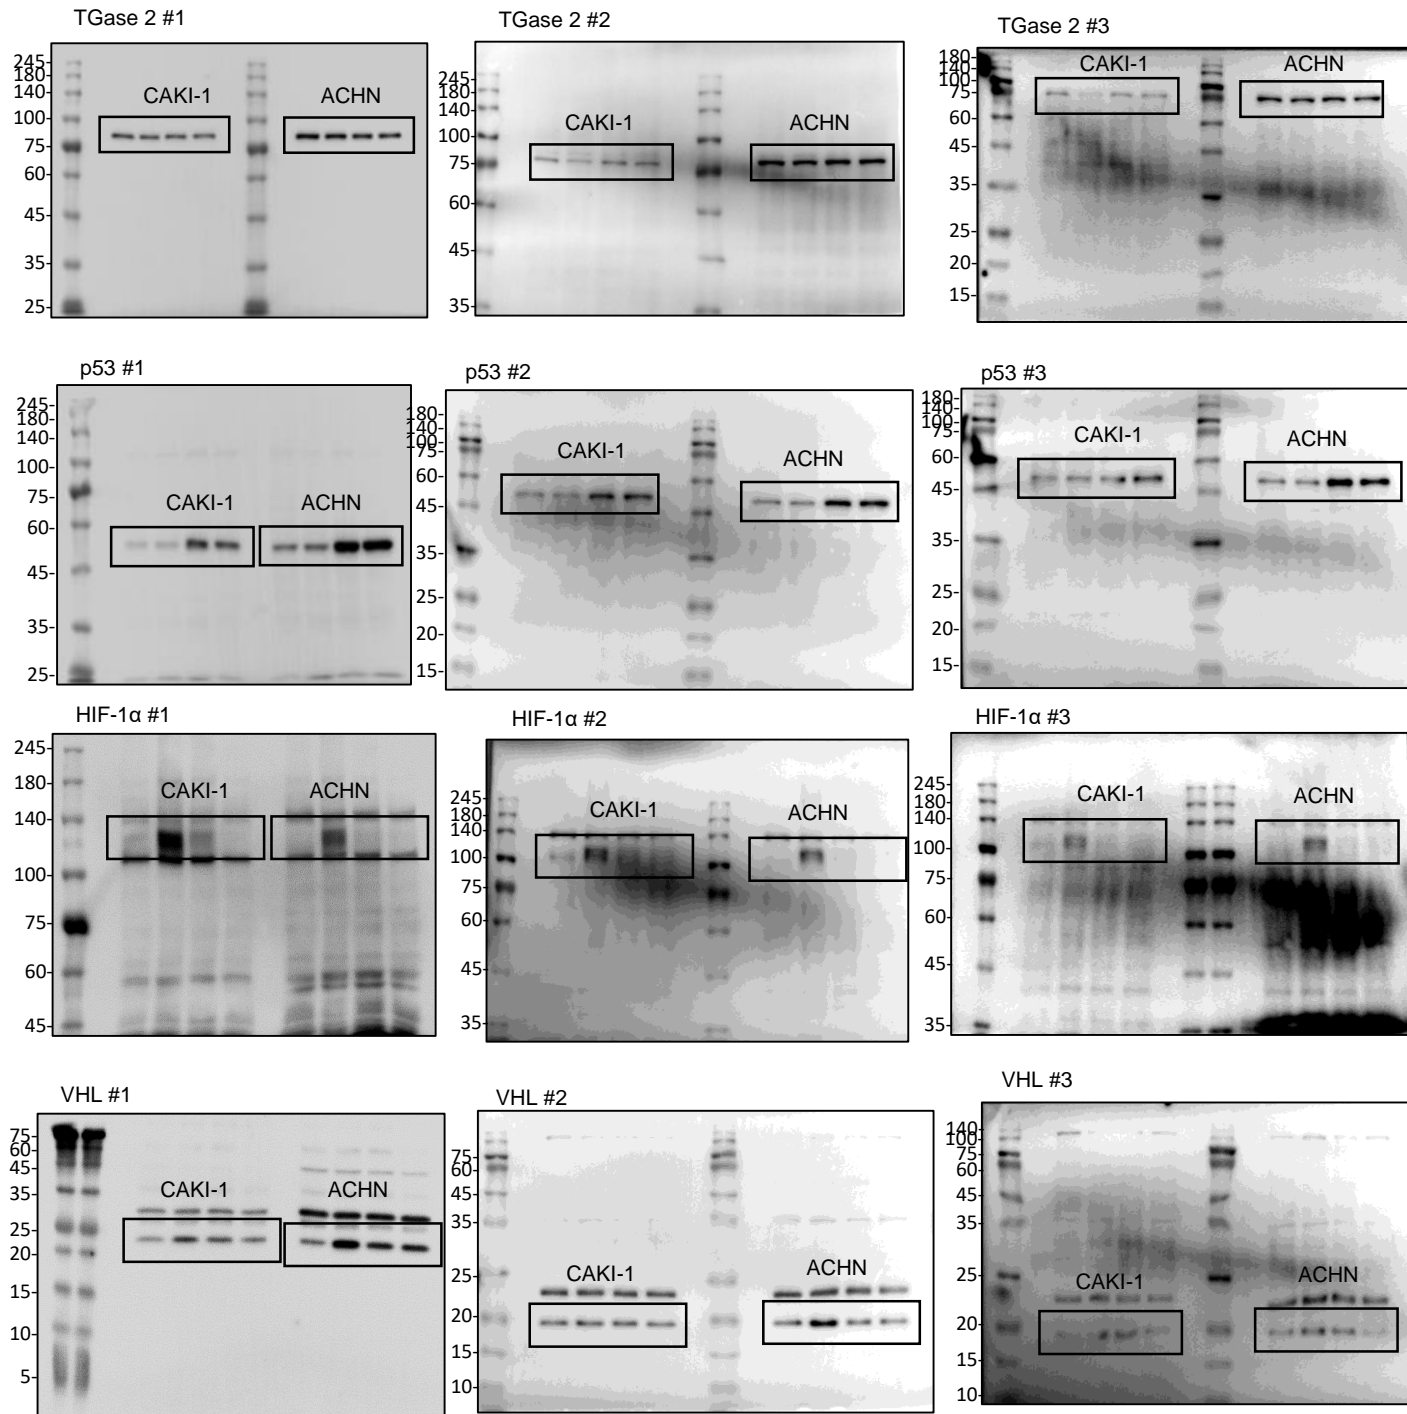

Supplementary Figure 2. Full gel images of western blotting

# Supplementary Figure 2

Figure 2A

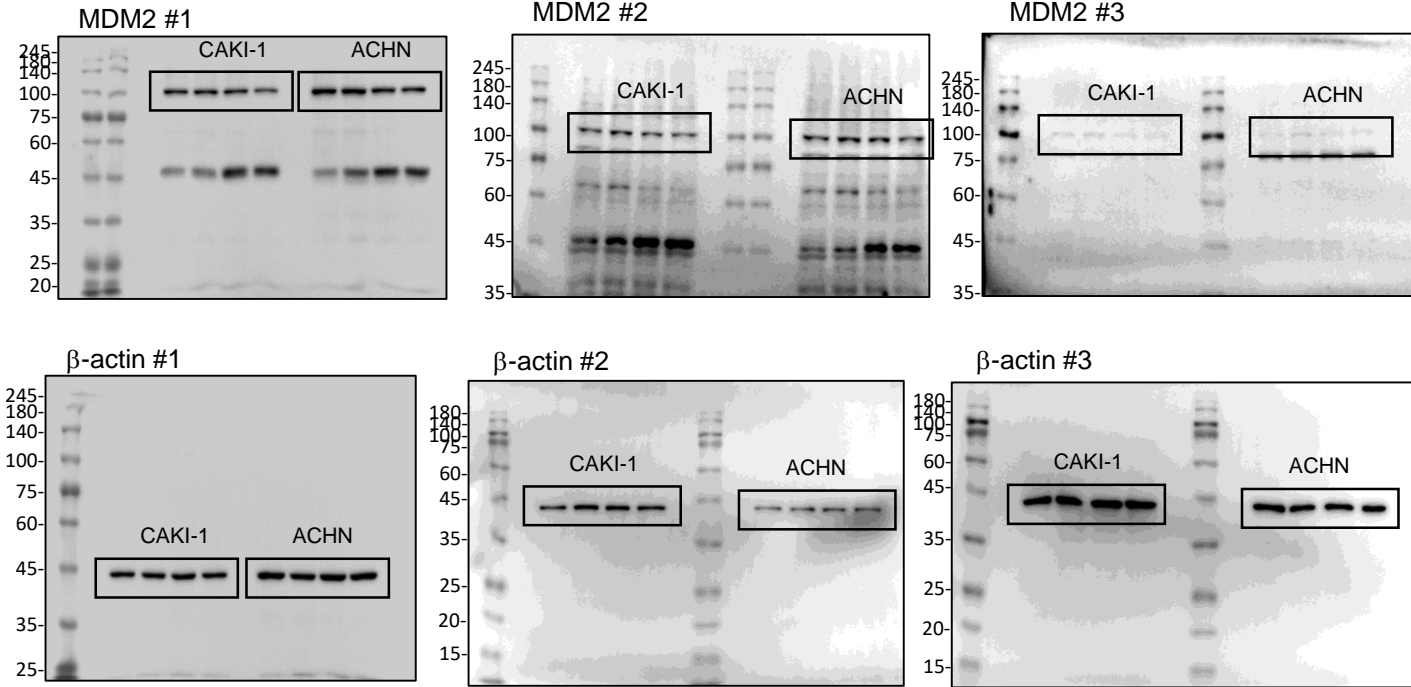

Supplementary Figure 2. Full gel images of western blotting

# Supplementary Figure 2

Figure 2C

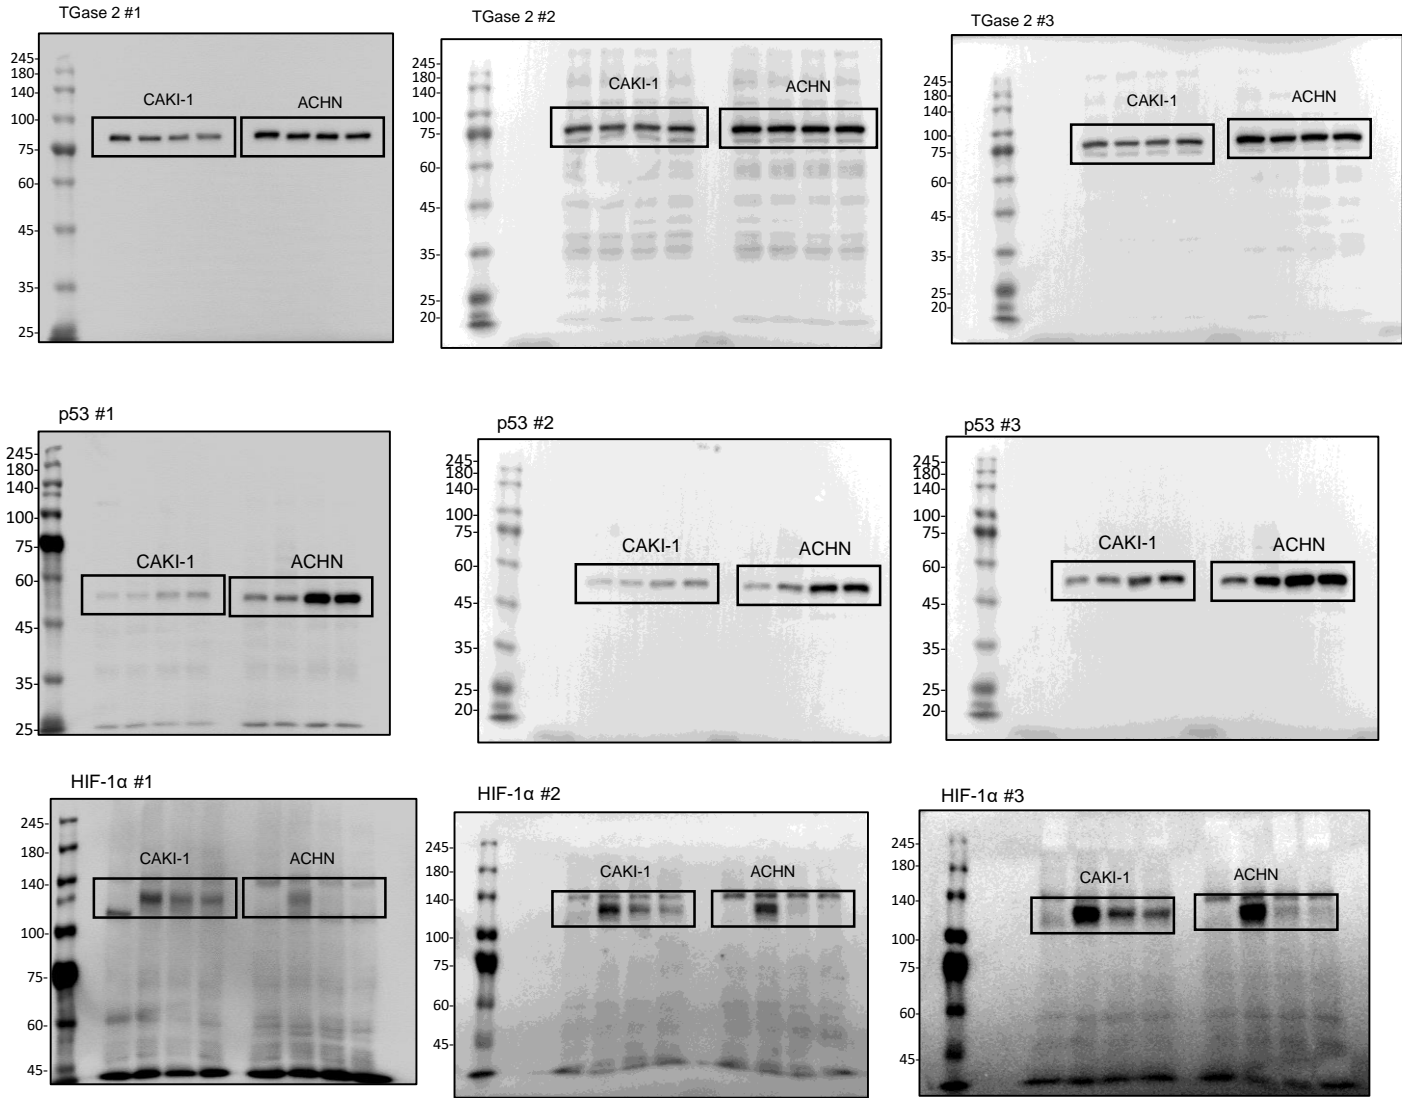

Supplementary Figure 2. Full gel images of western blotting

# Supplementary Figure 2

Figure 2C

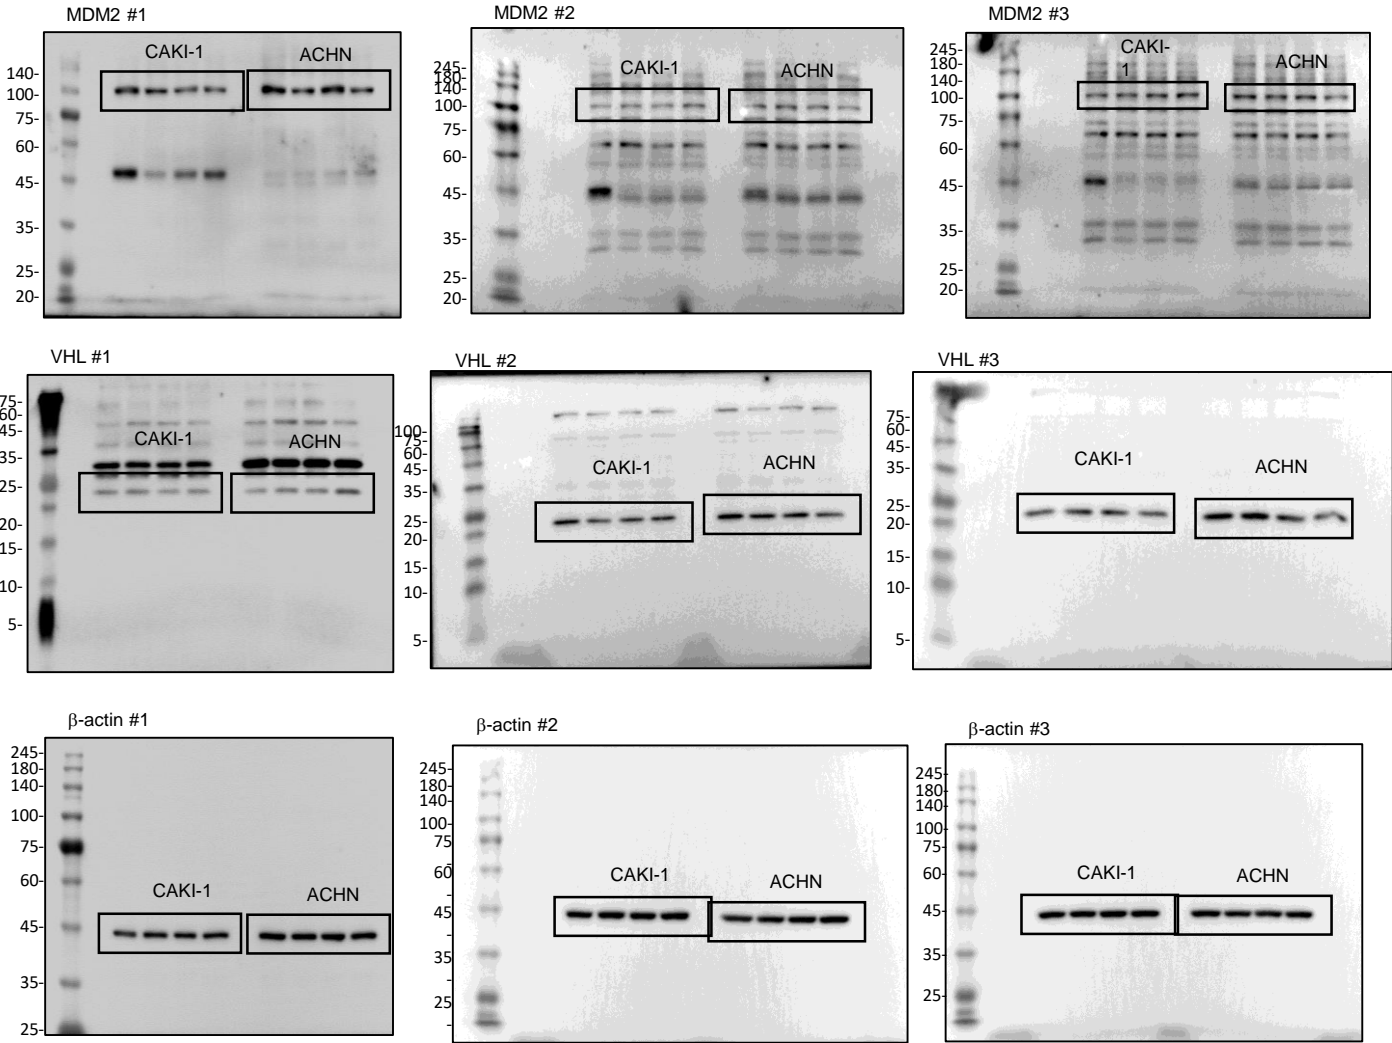

Supplementary Figure 2. Full gel images of western blotting

# Supplementary Figure 2

Figure 2E

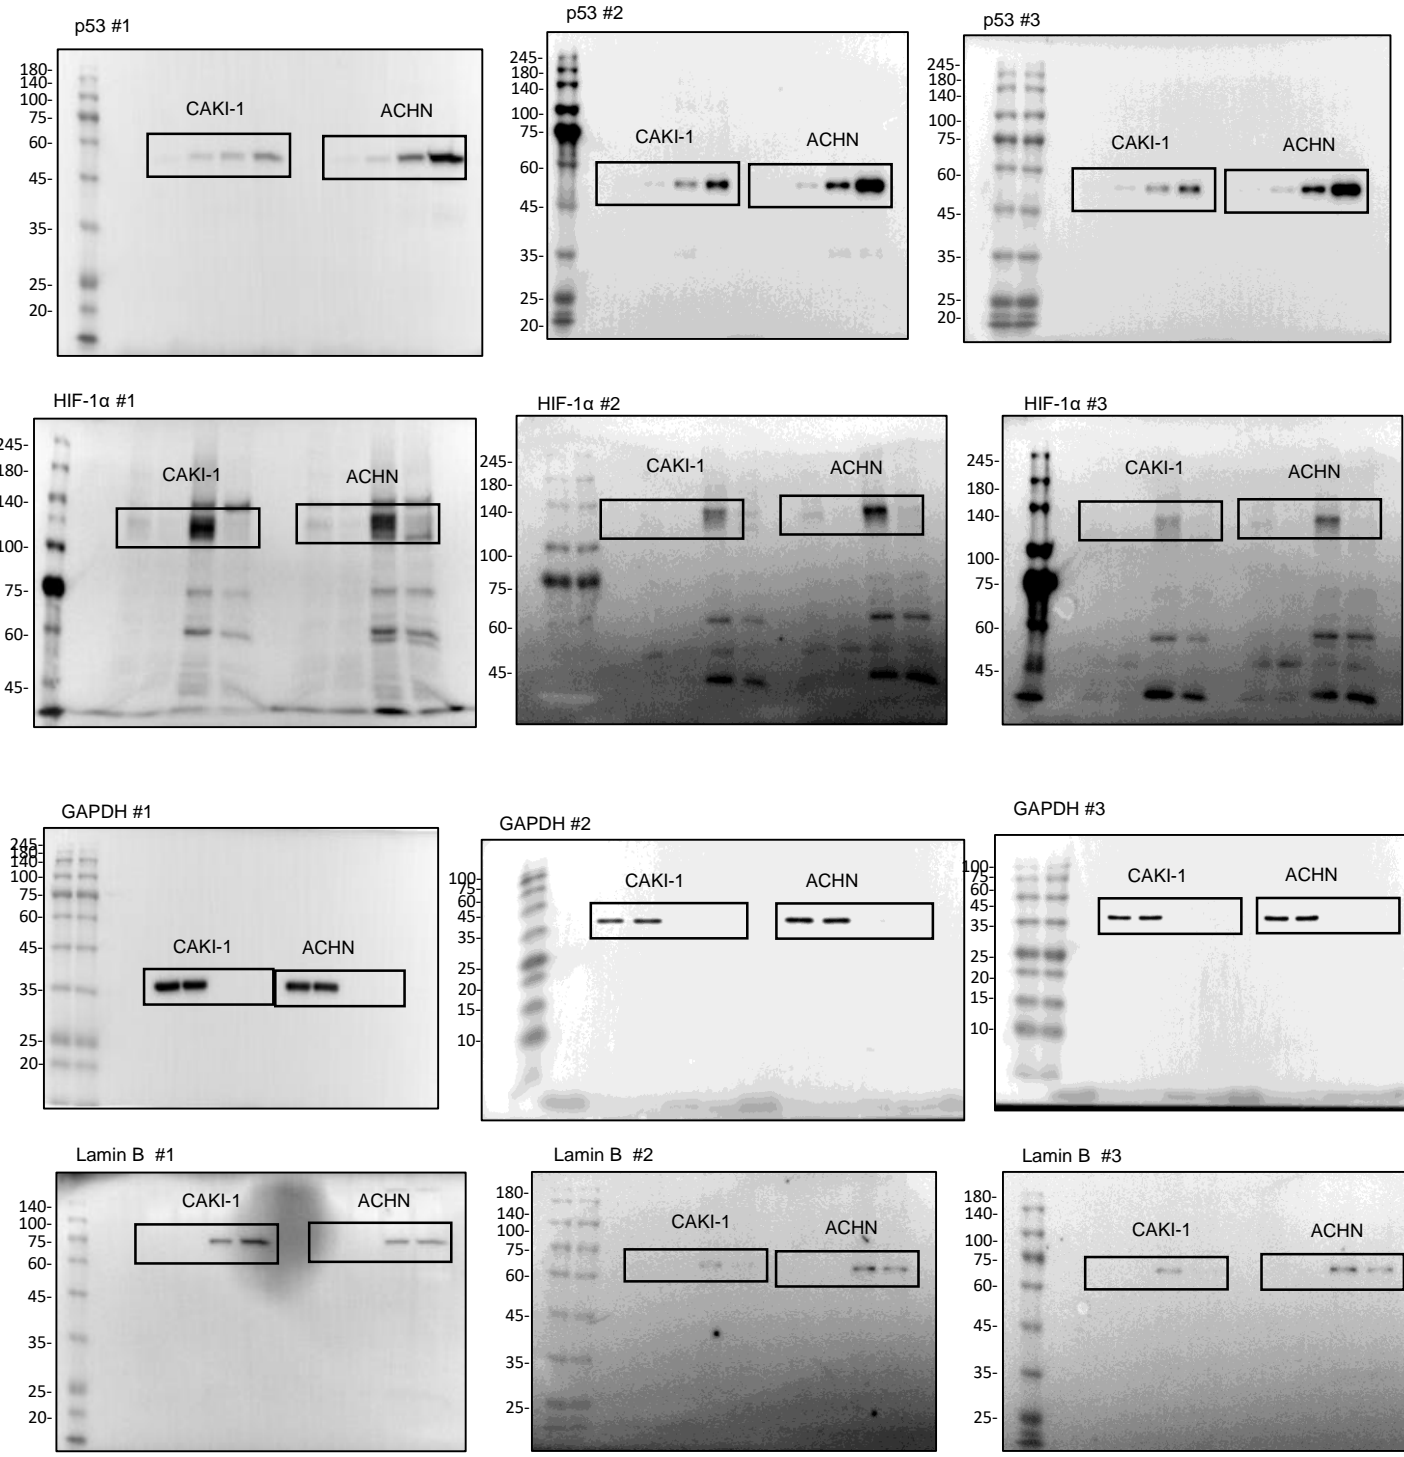

Supplementary Figure 2. Full gel images of western blotting

# Supplementary Figure 2

Figure 3A

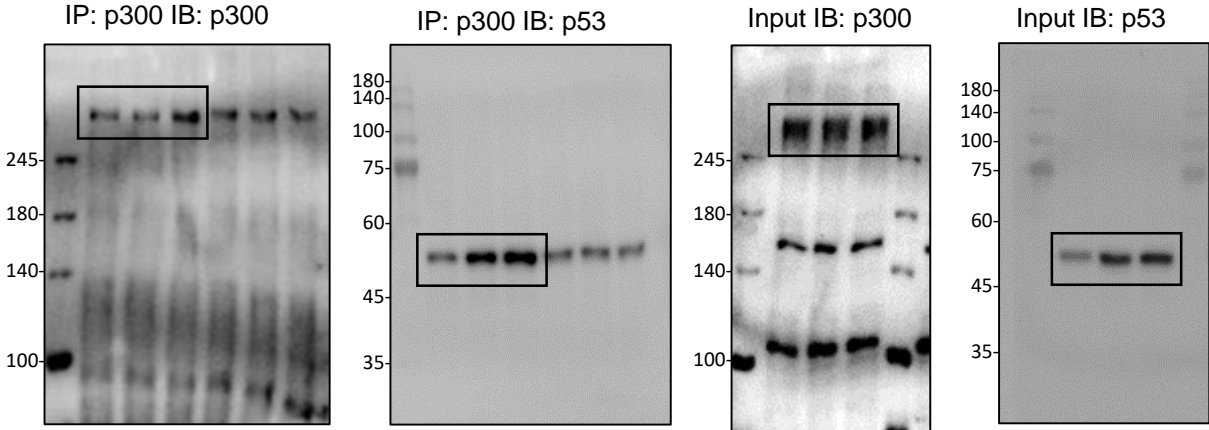

Supplementary Figure 2. Full gel images of western blotting



# Supplementary Figure 3

Control

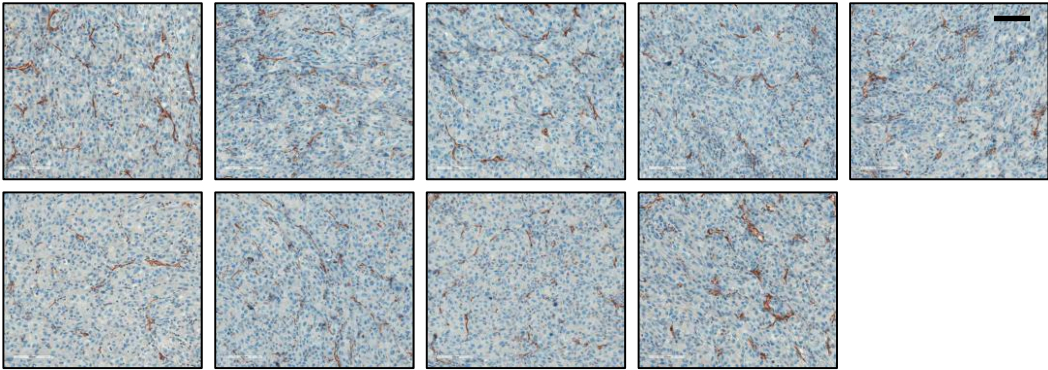

Streptonigrin

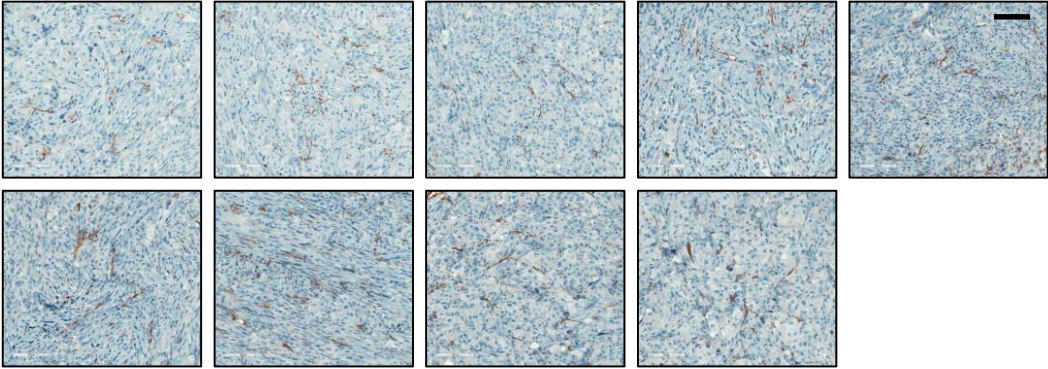

Pazopanib

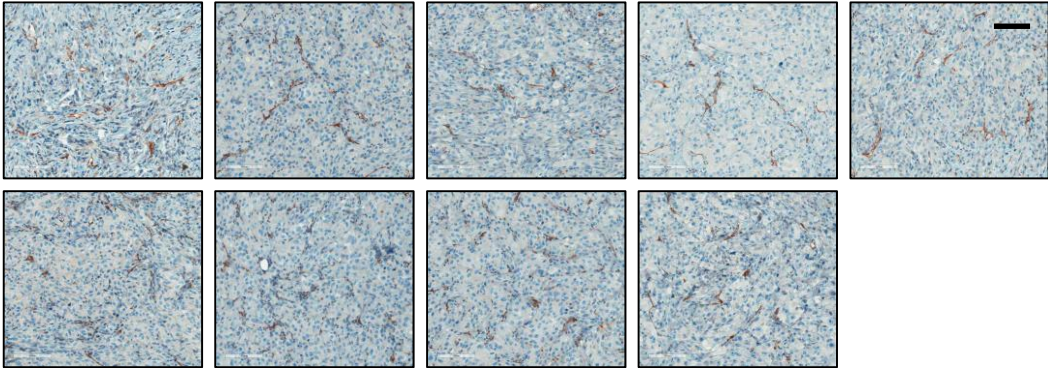

Combination

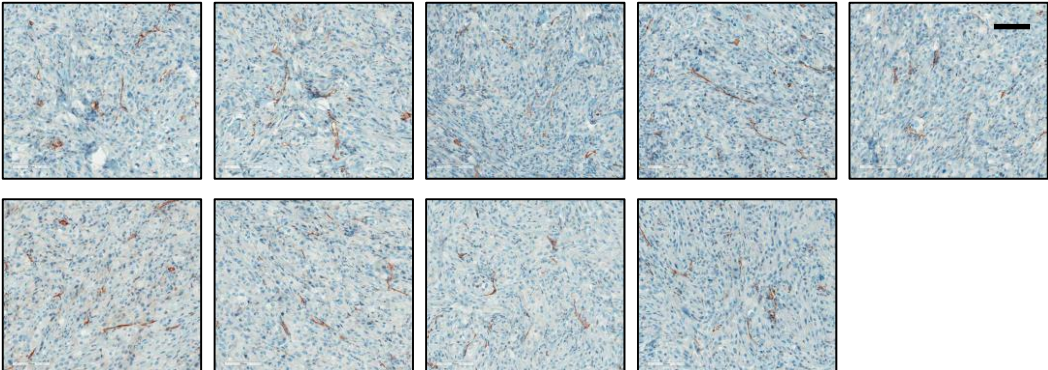

Supplementary Figure 3. Immunohistochemical staining of CD31 in CAKI-1 tumor xenograft. Scale bar = 100  $\mu$ m.

# Supplementary Table 1

| Age | Sex    | Organ  | Diagnosis                                                   | TNM     |
|-----|--------|--------|-------------------------------------------------------------|---------|
| 59  | Male   | Kidney | renal cell carcinoma, clear cell type                       | T2aN0M0 |
| 67  | Female | Kidney | renal cell carcinoma, clear cell and granular cell type     | T2aNXM0 |
| 65  | Male   | Kidney | renal cell carcinoma, clear cell and granular cell type     | T2bNXM0 |
| 59  | Male   | Kidney | renal cell carcinoma, clear cell and granular cell type     | T1bNXM0 |
| 56  | Male   | Kidney | renal cell carcinoma, clear cell and pseudosarcomatous type | T1bN0M1 |
| 42  | Female | Kidney | renal cell carcinoma, clear cell type                       | T3aNXM0 |
| 50  | Male   | Kidney | renal cell carcinoma, clear cell type                       | T1aN0M0 |
| 60  | Female | Kidney | renal cell carcinoma, clear cell type                       | T3aN0M0 |
| 69  | Female | Kidney | renal cell carcinoma, clear cell type                       | T2aNXM0 |
| 54  | Male   | Kidney | renal cell carcinoma, clear cell type                       | T1bNXM0 |
| 43  | Female | Kidney | renal cell carcinoma, clear cell type                       | T1aN0M0 |
| 53  | Male   | Kidney | renal cell carcinoma, clear cell type                       | T3aN0M1 |
| 59  | Male   | Kidney | renal cell carcinoma, clear cell type                       | T3aN0M0 |
| 61  | Male   | Kidney | renal cell carcinoma, collecting duct type                  | T1aNXM0 |
| 40  | Male   | Kidney | renal cell carcinoma, clear cell type                       | T1aNXM0 |
| 64  | Male   | Kidney | renal cell carcinoma, clear cell type                       | T1bN0M0 |
| 37  | Male   | Kidney | renal cell carcinoma, collecting duct type                  | T2bN0M0 |
| 65  | Male   | Kidney | renal cell carcinoma, papillary type                        | T1bNXM0 |
| 74  | Male   | Kidney | renal cell carcinoma, clear cell type                       | T3aN0M0 |
| 67  | Male   | Kidney | renal cell carcinoma, clear cell type                       | T4NXM0  |
| 50  | Male   | Kidney | renal cell carcinoma                                        | T2aN0M0 |
| 74  | Male   | Kidney | renal cell carcinoma, clear cell type                       | T3aN0M0 |
| 62  | Male   | Kidney | renal cell carcinoma, clear cell and granular cell type     | T3aN0M0 |
| 45  | Male   | Kidney | renal cell carcinoma, clear cell type                       | T1bN0M0 |
| 62  | Male   | Kidney | renal cell carcinoma                                        | T3aN1M0 |
| 53  | Male   | Kidney | renal cell carcinoma, clear cell type                       | T1bNXM0 |
| 64  | Male   | Kidney | renal cell carcinoma, clear cell type                       | T1bNXM0 |
| 72  | Male   | Kidney | renal cell carcinoma, clear cell type                       | T1aNXM0 |
| 62  | Female | Kidney | renal cell carcinoma, clear cell type                       | T3aN0M0 |
| 56  | Male   | Kidney | renal cell carcinoma, clear cell type                       | T3aN0M0 |
| 58  | Male   | Kidney | renal cell carcinoma                                        | T2aN0M0 |
| 57  | Male   | Kidney | renal cell carcinoma, clear cell and granular cell type     | T3bN0M0 |
| 43  | Female | Kidney | renal cell carcinoma, clear cell type                       | T1bN0M0 |
| 52  | Female | Kidney | renal cell carcinoma, granular cell type                    | T1bN0M0 |
| 64  | Male   | Kidney | renal cell carcinoma, granular cell type                    | T3aN0M0 |
| 57  | Male   | Kidney | renal cell carcinoma, clear cell type                       | T1bN0M0 |
| 59  | Male   | Kidney | renal cell carcinoma, clear cell and granular cell type     | T2aNXM0 |
| 47  | Male   | Kidney | renal cell carcinoma, clear cell type                       | T1aNXM0 |
| 77  | Male   | Kidney | renal cell carcinoma, clear cell type                       | T1aN0M0 |
| 47  | Female | Kidney | renal cell carcinoma, clear cell and granular cell type     | T2aNXM0 |
| 55  | Female | Kidney | renal cell carcinoma, clear cell type                       | T3aN0M0 |

Supplementary table 1. Information of human kidney cancer tissue array. Tissues diagnosis were primary kidney renal cell carcinoma, clear cell type or granular cell type. Age was from 37 to 77. Gender was male or female. TNM stage were referred to the AJCC Cancer Staging Manual (7th Edition).
